# Supplementary material
Source: PubMed Central journal article supplement (PMC2862080)
Supplement: NIHMS184755-supplement-supplement_1.pdf [file NIHMS184755-supplement-supplement_1.pdf]

496 NHPs. Significant pair wise association between different experiments and models was  
497 tested based on a chi squared test and phi coefficient.

498

499 **Online supplements.**

500

501 **Online supplement 1. *Mycobacterium tuberculosis* transposon (Tn) mutants found to**  
502 **be attenuated for survival in the NHP aerosol model**

503 <sup>a</sup>, Present in two different pools; <sup>b</sup>, The two mutants with identical JHU ID are indeed  
504 genotypically identical (= derived from same parental strain and have the same himar1  
505 Tn inserted at the same site. However, the two strains were made and isolated at two  
506 different experiments) [14]; <sup>c</sup>, Positive control average value of pools 1 and 2 but not  
507 found in pool 3; <sup>d</sup>, By random chance, in a few cases, the transposon point of insertion  
508 can land in the different site; <sup>†</sup>, validated by real time PCR.

509

510 **Online supplement 2. Clinical measures of disease progression.**

511 (A) Temporal changes of body temperature (°C) following exposure to infectious aerosol  
512 of *Mtb* mutants. (B) % Loss of body weight. (C) Whole blood IFN- $\gamma$  release assay  
513 (Primagam, A<sub>450</sub>) at the time of necropsy. The results are shown as mean  $\pm$  SD of  
514 triplicate experiment. The line perpendicular to X-axis and closer to Y-axis indicates a  
515 very likely presence of *Mtb* infection. A second line perpendicular to X-axis and farther  
516 from the Y-axis indicates the acceptance range of mean absorbance of the primate IFN- $\gamma$   
517 positive control. (D) Elevated serum C-reactive protein level (mg/L). (E) Confocal laser  
518 microscopy images show the lung sections of (i) animals belonging to the input pool

519 (DE81) and (ii) animals belonging to the output pool (DV08) respectively, stained with  
520 *Mtb* (green) and macrophage (red) markers.

521

Type of file: figure

Label: 5

Filename: Supplemental\_Online\_Figure.tif

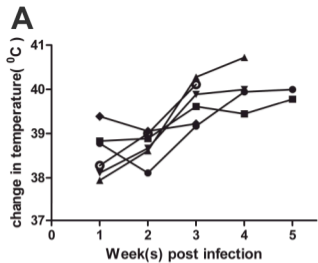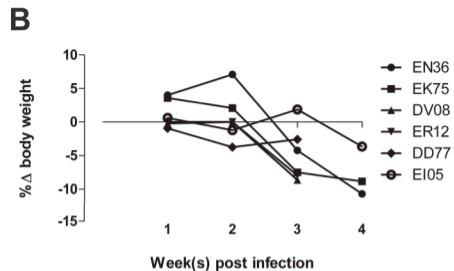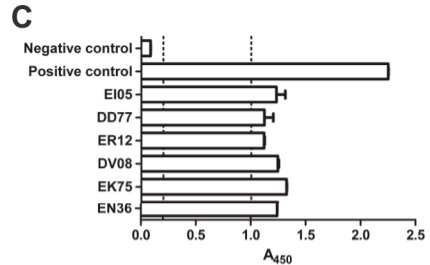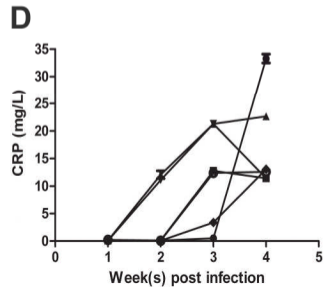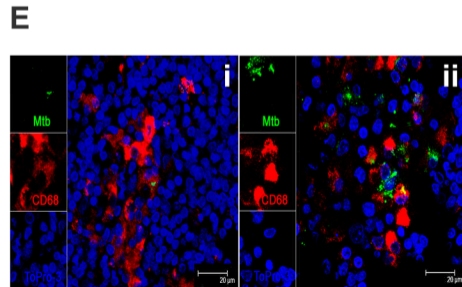

Type of file: table

Label: 2

Filename: Online\_supplement\_table.doc

**Online Supplement-1. *Mycobacterium tuberculosis* transposon (Tn) mutants found to be attenuated for survival in the NHP aerosol model**

| MT/RV#               | Symbol           | Functional class | Description                         | Fold change<br>Mean $\pm$ SD | p Value  |
|----------------------|------------------|------------------|-------------------------------------|------------------------------|----------|
| MT1025.3             |                  | 10               | Hypothetical protein                | 3.59 $\pm$ 0.49              | 1.45E-07 |
| MT1622.1             |                  | 10               | Conserved hypothetical protein      | 6.09 $\pm$ 5.10              | 0.005    |
| MT1650.1             |                  | 10               | Hypothetical protein                | 1.99 $\pm$ 0.77              | 8.08E-05 |
| MT2316               |                  | 10               | Hypothetical protein                | 1.79 $\pm$ 0.83              | 0.0002   |
| MT2375               |                  | 10               | Hypothetical protein                | 2.03 $\pm$ 1.13              | 0.0005   |
| MT2960 <sup>a†</sup> |                  | 10               | Hypothetical protein                | 7.76 $\pm$ 3.20              | 0.0006   |
| MT2960 <sup>a†</sup> |                  | 10               | Hypothetical protein                | 7.13 $\pm$ 4.36              | 0.001    |
| MT3037               |                  | 10               | Hypothetical protein                | 7.82 $\pm$ 5.05              | 0.001    |
| MT3536 <sup>a</sup>  |                  | 10               | Hypothetical protein                | 2.88 $\pm$ 0.71              | 4.55E-06 |
| MT3536 <sup>a</sup>  |                  | 10               | Hypothetical protein                | 5.68 $\pm$ 3.21              | 0.0007   |
| Rv0068               |                  | 7                | Oxidoreductase                      | 4.57 $\pm$ 1.84              | 0.0001   |
| Rv0079               |                  | 10               | Hypothetical protein                | 2.38 $\pm$ 0.88              | 5.66E-05 |
| Rv0084 <sup>†</sup>  | <i>hycD</i>      | 7                | Formate hydrogenlyase, subunit 4    | 7.31 $\pm$ 4.95              | 0.002    |
| Rv0157A <sup>b</sup> |                  | 10               | Hypothetical protein                | 4.24 $\pm$ 4.14              | 0.01     |
| Rv0157A <sup>b</sup> |                  | 10               | Hypothetical protein                | 4.92 $\pm$ 4.11              | 0.005    |
| Rv0163               |                  | 10               | Conserved hypothetical protein      | 2.17 $\pm$ 0.70              | 2.69E-05 |
| Rv0173               | <i>mce1E</i>     | 3                | Virulence factor mce family protein | 6.60 $\pm$ 1.44              | 1.92E-06 |
| Rv0179c              | <i>lprO</i>      | 3                | Hypothetical protein                | 3.63 $\pm$ 0.99              | 8.53E-06 |
| Rv0213c              |                  | 7                | Methyltransferase, putative         | 6.45 $\pm$ 2.89              | 0.0002   |
| Rv0240               |                  | 0                | Hypothetical protein                | 3.03 $\pm$ 2.25              | 0.003    |
| Rv0250c              |                  | 10               | Conserved hypothetical protein      | 2.55 $\pm$ 0.74              | 0.0001   |
| Rv0336               |                  | 5                | insertion seqs and phages           | 7.35 $\pm$ 5.19              | 0.002    |
| Rv0381c              |                  | 3                | Hypothetical protein                | 5.20 $\pm$ 0.17              | 8.46E-12 |
| Rv0393 <sup>†</sup>  |                  | 5                | Conserved protein                   | 1.46 $\pm$ 0.14              | 7.62E-09 |
| Rv0404               | <i>fadD30</i>    | 1                | Acyl-CoA synthase                   | 5.19 $\pm$ 3.79              | 0.003    |
| Rv0466 <sup>†</sup>  |                  | 10               | Hypothetical protein                | 3.70 $\pm$ 0.51              | 8.25E-08 |
| Rv0491               | <i>regX3</i>     | 9                | DNA-binding response regulator      | 5.61 $\pm$ 4.50              | 0.004    |
| Rv0502               |                  | 10               | Acyltransferase family protein      | 2.95 $\pm$ 1.62              | 0.0006   |
| Rv0576 <sup>†</sup>  |                  | 9                | Transcriptional regulator           | 3.09 $\pm$ 0.41              | 6.47E-08 |
| Rv0580c <sup>†</sup> |                  | 10               | Hypothetical protein                | 3.36 $\pm$ 1.09              | 2.72E-05 |
| Rv0595c <sup>†</sup> |                  | 0                | Conserved hypothetical protein      | 7.76 $\pm$ 4.42              | 0.0008   |
| Rv0654               |                  | 7                | Dioxygenase, putative               | 8.08 $\pm$ 4.39              | 0.0006   |
| Rv0671               | <i>lpqP</i>      | 3                | Hydrolase/esterase, lpqP            | 4.52 $\pm$ 1.39              | 1.88E-05 |
| Rv0687               | <i>fabG</i>      | 7                | Oxidoreductase                      | 6.23 $\pm$ 0.60              | 7.07E-09 |
| Rv0872c              | <i>PE_PGRS15</i> | 6                | PE_PGRS family protein              | 6.23 $\pm$ 0.71              | 2.24E-08 |
| Rv0910               |                  | 10               | Conserved hypothetical protein      | 4.64 $\pm$ 1.73              | 6.49E-05 |

|                       |               |    |                                  |            |          |
|-----------------------|---------------|----|----------------------------------|------------|----------|
| Rv0924c               | <i>mntH</i>   | 3  | Transport protein, NRAMP family  | 8.68±2.73  | 1.69E-05 |
| Rv0948c               |               | 10 | Hypothetical protein             | 7.15±0.30  | 2.11E-11 |
| Rv0954 <sup>†</sup>   |               | 3  | Antigen 34 kDa                   | 1.44±0.07  | 1.30E-10 |
| Rv0976c               |               | 10 | Conserved hypothetical protein   | 3.56±2.50  | 0.002    |
| Rv1001                | <i>arcA</i>   | 7  | Arginine deiminase               | 7.07±0.42  | 2.70E-10 |
| Rv1076                | <i>lipU</i>   | 7  | Esterase                         | 5.42±0.14  | 8.50E-12 |
| Rv1176c <sup>†</sup>  |               | 10 | Hypothetical protein             | 5.07±3.95  | 0.004    |
| Rv1181                | <i>pks4</i>   | 1  | Mycocerosic acid synthase        | 4.92±3.90  | 0.004    |
| Rv1185c <sup>†</sup>  | <i>fad21</i>  | 1  | Acyl-CoA synthase                | 8.12±3.72  | 0.0002   |
| Rv1200                |               | 3  | Sugar transporter family protein | 3.63±0.05  | 0.003    |
| Rv1234                |               | 3  | cell wall and cell processes     | 10.02±2.87 | 1.02E-05 |
| Rv1264                |               | 7  | Adenylate cyclase, putative      | 6.49±4.71  | 0.002    |
| Rv1371 <sup>†</sup>   |               | 3  | Desaturase-related protein       | 2.65±0.32  | 3.41E-08 |
| Rv1433                |               | 3  | Conserved hypothetical protein   | 5.73±3.31  | 0.0008   |
| Rv1448c               | <i>tal</i>    | 7  | Transaldolase                    | 2.68± 1.25 | 0.0002   |
| Rv1489                |               | 10 | Hypothetical protein             | 2.46±0.76  | 1.92E-05 |
| Rv1633                | <i>uvrB</i>   | 2  | Excinuclease ABC, subunit B      | 8.18±4.17  | 0.0004   |
| Rv1704c <sup>†</sup>  | <i>cycA</i>   | 3  | Amino acid permease              | 4.12±0.18  | 2.79E-11 |
| Rv1769                |               | 10 | Conserved hypothetical protein   | 4.90 ±3.92 | 0.004    |
| Rv1799                | <i>lppT</i>   | 3  | Hypothetical protein             | 3.71±2.34  | 0.001    |
| Rv1804c               |               | 10 | Hypothetical protein             | 7.52±4.83  | 0.001    |
| Rv1810                |               | 10 | Hypothetical protein             | 2.94±1.17  | 9.73E-05 |
| Rv1864c <sup>c†</sup> |               | 10 | Conserved hypothetical protein   | 3.09± 1.50 | 0.03     |
| Rv1879                |               | 10 | Conserved hypothetical protein   | 3.35±0.26  | 1.57E-09 |
| Rv1894c               |               | 10 | Hypothetical protein             | 4.32±2.82  | 0.001    |
| Rv1965                | <i>yrbE3B</i> | 0  | Conserved hypothetical protein   | 7.21±3.39  | 0.0002   |
| Rv1966                | <i>Mce1A</i>  | 0  | Virulence factor                 | 1.76±0.83  | 0.0001   |
| Rv1978 <sup>†</sup>   |               | 10 | Hypothetical protein             | 9.02±5.50  | 0.001    |
| Rv2041c               |               | 3  | Sugar ABC-transporter            | 2.80± 1.22 | 0.0001   |
| Rv2046                | <i>lppI</i>   | 3  | Hypothetical protein             | 6.45±3.85  | 0.001    |
| Rv2072c <sup>†</sup>  | <i>cobL</i>   | 7  | Methyltransferase                | 4.77±0.33  | 5.58E-10 |
| Rv2077c               |               | 3  | Hypothetical protein             | 3.17±1.74  | 0.0006   |
| Rv2091c               |               | 10 | Conserved hypothetical protein   | 2.64±0.57  | 2.30E-06 |
| Rv2309A               |               | 16 | Hypothetical protein             | 3.90±1.33  | 3.63E-05 |
| Rv2385                | <i>lipK</i>   | 1  | Esterase, putative               | 5.60±2.79  | 0.0002   |
| Rv2387 <sup>d†</sup>  |               | 10 | Hypothetical protein             | 4.19±2.41  | 0.0008   |
| Rv2387 <sup>d†</sup>  |               | 10 | Hypothetical protein             | 10.28±1.17 | 2.22E-08 |
| Rv2459 <sup>†</sup>   |               | 3  | Drug transporter                 | 7.04±3.78  | 0.0005   |
| Rv2478c               |               | 10 | Hypothetical protein             | 7.62±5.21  | 0.002    |
| Rv2485c               | <i>lipQ</i>   | 7  | Carboxylesterase family protein  | 3.04±1.84  | 0.001    |
| Rv2588c               | <i>yajC</i>   | 3  | Protein-export membrane protein  | 4.11±4.22  | 0.01     |
| Rv2597                |               | 3  | Hypothetical protein             | 7.48±0.20  | 1.14E-12 |
| Rv2641                | <i>cadI</i>   | 10 | Conserved hypothetical protein   | 2.82±0.39  | 8.84E-08 |

|                      |                   |    |                                     |            |          |
|----------------------|-------------------|----|-------------------------------------|------------|----------|
| Rv2686c              |                   | 3  | Hypothetical protein                | 3.83±2.33  | 0.001    |
| Rv2690c              |                   | 3  | Amino acid permease, putative       | 5.85±4.68  | 0.004    |
| Rv2694c              |                   | 10 | Conserved hypothetical protein      | 3.20±0.36  | 2.26E-08 |
| Rv2725c              | <i>hflX</i>       | 7  | GTP-binding protein (hflX)          | 5.56±4.28  | 0.003    |
| Rv2741               | <i>PE_PGRS47</i>  | 6  | PE_PGRS family protein              | 6.07±2.64  | 0.0001   |
| Rv2796c <sup>†</sup> | <i>lppV</i>       | 3  | Hypothetical protein                | 1.94±0.13  | 6.08E-10 |
| Rv2819c              |                   | 10 | CRISPR-associated protein,          | 1.57±0.69  | 0.0001   |
| Rv2820c              |                   | 16 | CRISPR-associated protein           | 7.19±5.05  | 0.002    |
| Rv2850c              |                   | 7  | Magnesium chelatase, putative       | 7.05±4.34  | 0.001    |
| Rv2879c              |                   | 10 | Conserved hypothetical protein      | 5.85± 3.66 | 0.001    |
| Rv2911               | <i>dacB1</i>      | 3  | D-alanyl-D-alanine carboxypeptidase | 3.27±0.69  | 1.15E-06 |
| Rv2920c              | <i>amt</i>        | 3  | Ammonium transporter                | 5.58±3.26  | 0.0009   |
| Rv2924c              | <i>fpg (mutM)</i> | 2  | DNA glycosylase                     | 3.46±0.66  | 5.28E-07 |
| Rv2936 <sup>†</sup>  | <i>drrA</i>       | 3  | ABC transporter                     | 9.01±5.52  | 0.001    |
| Rv3094c              |                   | 10 | Phenol hydroxylase                  | 4.20±4.45  | 0.01     |
| Rv3111               | <i>moaC1</i>      | 7  | Molybdopterin biosynthesis protein  | 3.96± 2.69 | 0.002    |
| Rv3117               | <i>cysA3</i>      | 7  | Thiosulfate sulfurtransferase       | 7.88±3.08  | 8.72E-05 |
| Rv3159c              | <i>PPE53</i>      | 6  | PPE family protein                  | 6.24±0.59  | 6.45E-09 |
| Rv3197 <sup>†</sup>  |                   | 3  | ABC transporter                     | 7.07±4.41  | 0.001    |
| Rv3297 <sup>†</sup>  | <i>nei</i>        | 2  | Endonuclease                        | 7.27±4.61  | 0.001    |
| Rv3327 <sup>†</sup>  |                   | 5  | IS1547, transposase                 | 6.35±4.96  | 0.004    |
| Rv3430c              |                   | 5  | IS1540, transposase                 | 3.52±0.18  | 9.66E-11 |
| Rv3486               |                   | 10 | Conserved hypothetical protein      | 6.25±5.01  | 0.004    |
| Rv3494c              | <i>mce4F</i>      | 0  | Virulence factor mce family protein | 5.58±2.52  | 0.0001   |
| Rv3495c              | <i>lprN</i>       | 0  | Virulence factor mce family protein | 3.73±1.23  | 2.59E-05 |
| Rv3683               |                   | 10 | Conserved hypothetical protein      | 3.99± 2.77 | 0.002    |
| Rv3727               |                   | 7  | Hypothetical protein                | 0.80±0.04  | 1.01E-10 |
| Rv3741c <sup>†</sup> |                   | 7  | Hypothetical protein                | 7.23±5.55  | 0.008    |
| Rv3775               | <i>lipE</i>       | 7  | Conserved hypothetical protein      | 6.51±5.04  | 0.004    |
| Rv3787c <sup>†</sup> |                   | 10 | Conserved hypothetical protein      | 6.70±3.57  | 0.01     |
| Rv3793               | <i>embC</i>       | 3  | Arabinosyl transferase              | 6.77±0.39  | 1.96E-10 |
| Rv3830c              | <i>mce4E</i>      | 9  | Transcriptional regulator           | 5.28±0.56  | 6.38E-09 |
| Rv3871 <sup>†</sup>  |                   | 3  | FtsK/SpoIIIE family protein         | 9.32±4.91  | 0.002    |
